# Supplementary material for: An in situ generated 3D porous nanostructure on 2D nanosheets to boost the oxygen evolution reaction for water-splitting
Source: Royal Society of Chemistry journal article supplement (doi:10.1039/d1nr08007e), 2022-01-01
Supplement: d1nr08007e4.pdf [file d1nr08007e4.pdf]

## **In-situ generated 3D porous nanostructure onto 2D nanosheets to boost oxygen evolution reaction for water-splitting**

Wenli Yu<sup>1</sup>, Zhi Chen<sup>2</sup>, Ying Zhao<sup>2</sup>, Yuxiao Gao<sup>2</sup>, Weiping Xiao<sup>3</sup>, Bin Dong<sup>1,\*</sup>, Zexing Wu<sup>2,\*</sup>, Lei Wang<sup>2,\*</sup>

<sup>1</sup> State Key Laboratory of Heavy Oil Processing, College of Science, China University of Petroleum (East China), Qingdao 266580, China

<sup>2</sup> Key Laboratory of Eco-chemical Engineering, Taishan Scholar Advantage and Characteristic Discipline Team of Eco Chemical Process and Technology, Qingdao International Cooperation Base of Ecological Chemical industry and Intelligent Manufacturing, College of Chemistry and Molecular Engineering, Qingdao University of Science and Technology, Qingdao 266042, P. R. China

<sup>3</sup> College of Science, Nanjing Forestry University, Nanjing, 210037, PR China

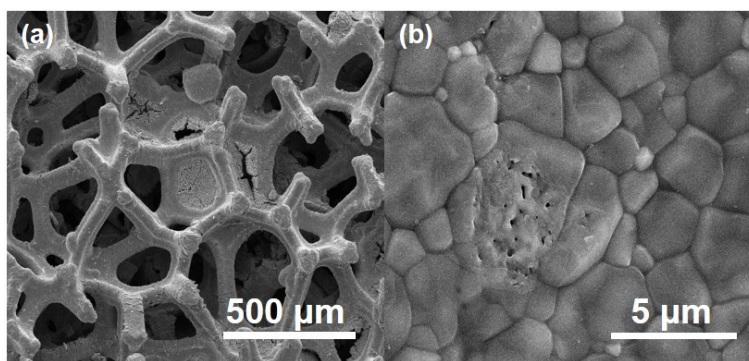

**Figure S1.** SEM image of iron foam with different magnification.

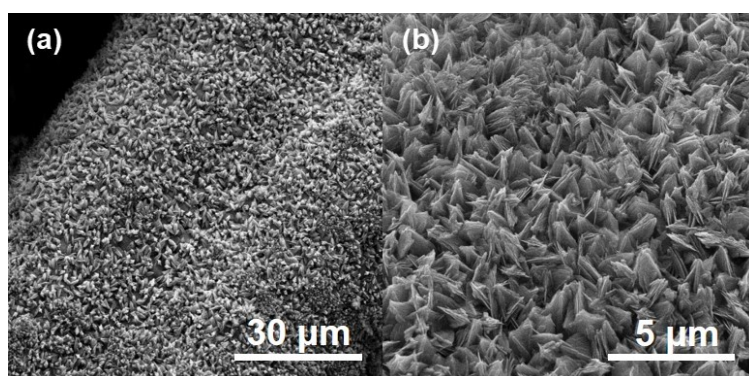

**Figure S2** SEM image of FeCoNi-NS with different magnification.

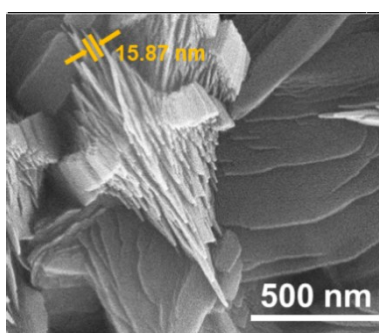

**Figure S3.** SEM image of FeCoNi-NS.

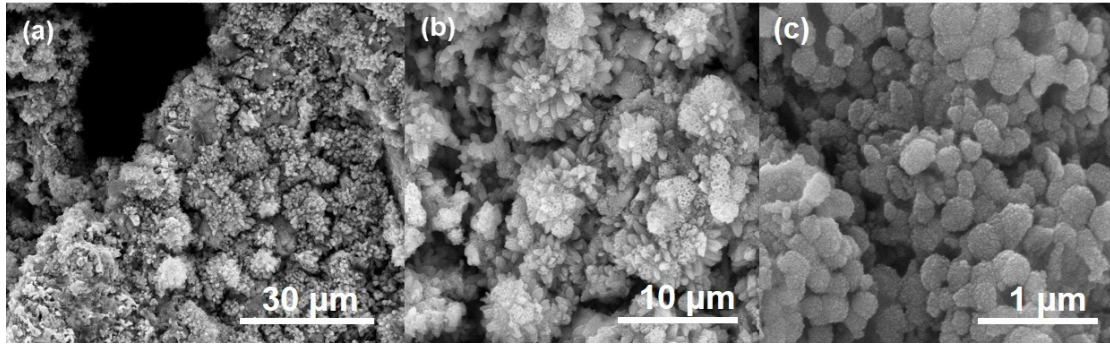

**Figure S4.** SEM image of FeCoNi-NS-ACVs with different magnification.

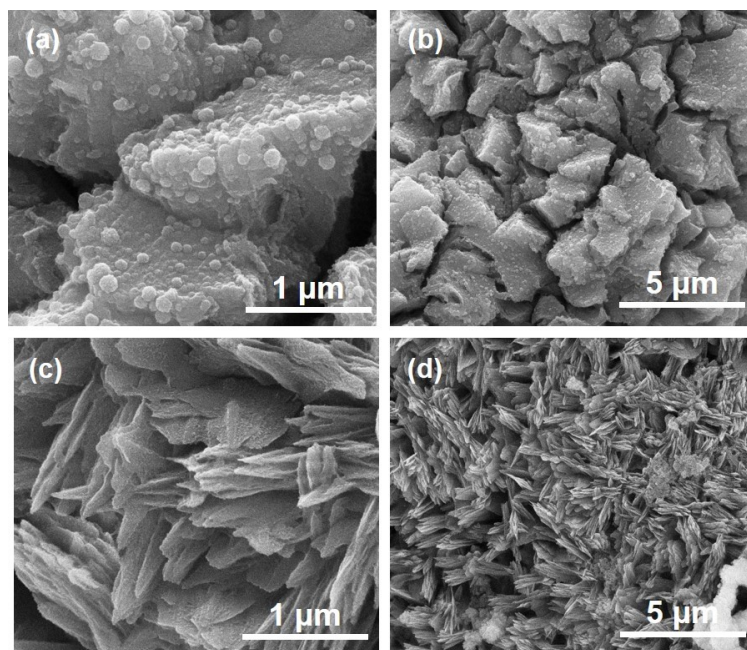

**Figure S5** SEM images of FeNi-NS-ACVs (a, b) and FeCo-NS-ACVs (c, d).

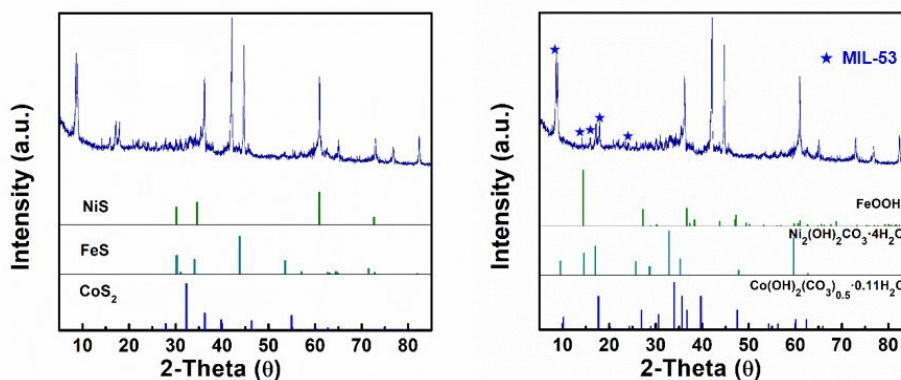

**Figure S6.** XRD pattern of the designed FeCoNi-NS-ACVs.

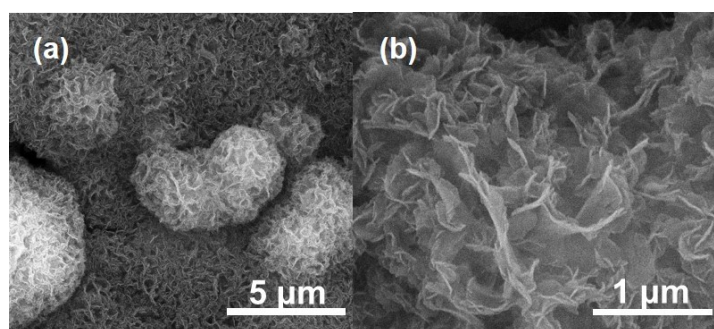

**Figure S7.** SEM image of FeCoNi-S with different magnification.

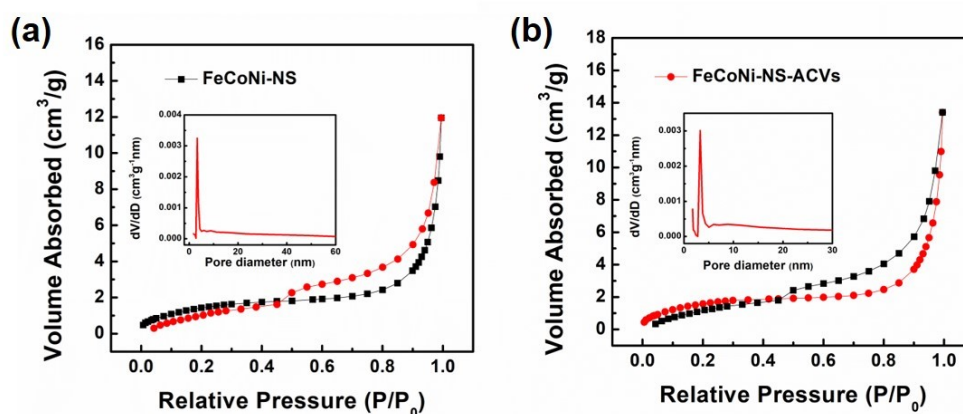

**Figure S8** N<sub>2</sub> sorption isotherms and pore size distribution curves of FeCoNi-NS (a) and FeCoNi-NS-ACVs (b).

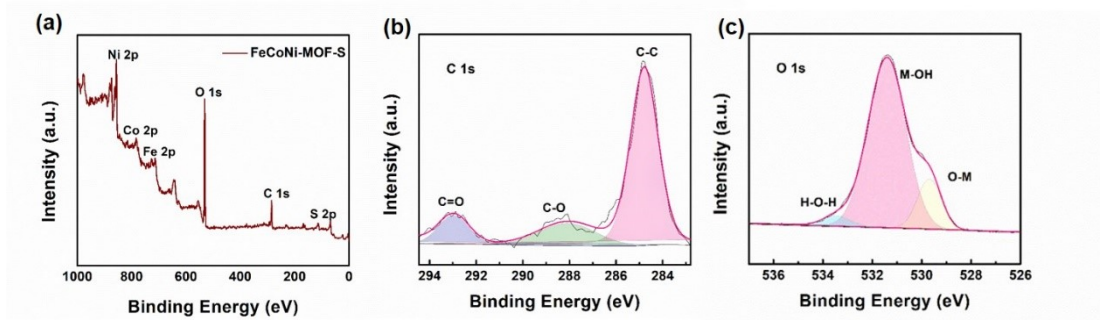

**Figure S9.** XPS survey spectrum (a) high-resolution of C 1s (b) and O 1s (c) of the designed FeCoNi-NS-ACVs.

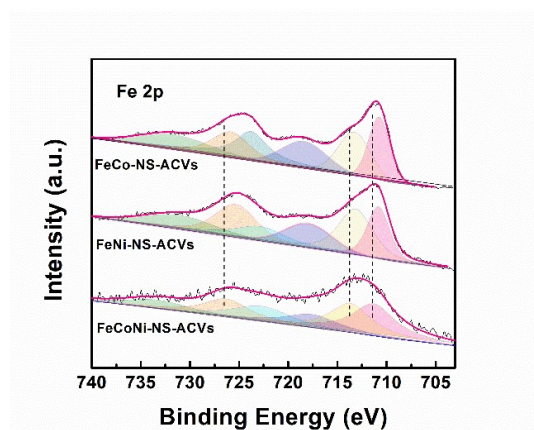

**Figure S10.** High-resolution Fe 2p XPS spectra of FeCo-NS-ACVs, FeNi-NS-ACVs and FeCoNi-NS-ACVs.

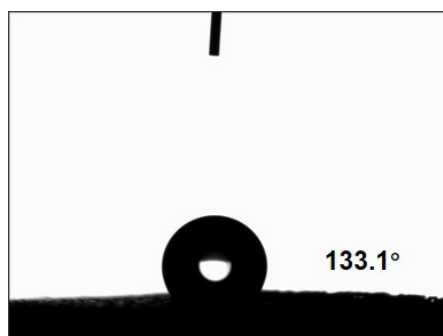

**Figure S11.** Contact angle measurement of IF.

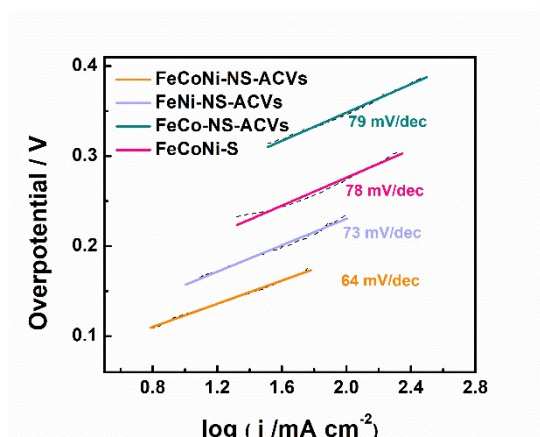

**Figure S12.** Tafel slopes of obtained catalysts in 1M KOH.

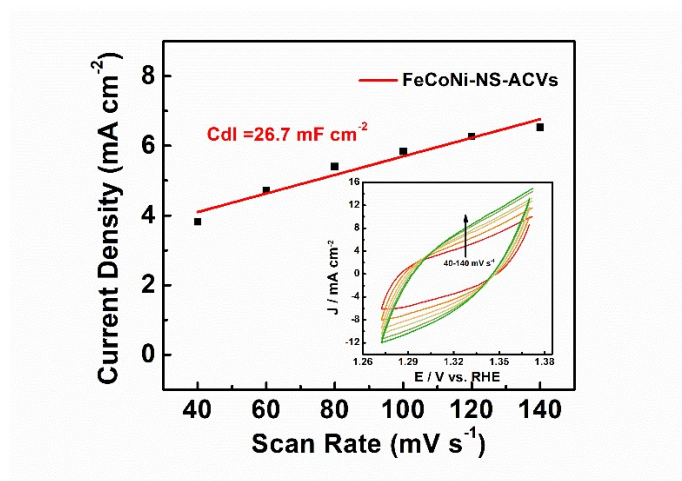

**Figure S13** Linear fitting of scan rates with capacitive current densities at 0.25 V (vs SCE) under different scan rate (inset is CV curves of FeCoNi-NS-ACVs under different scan rates).

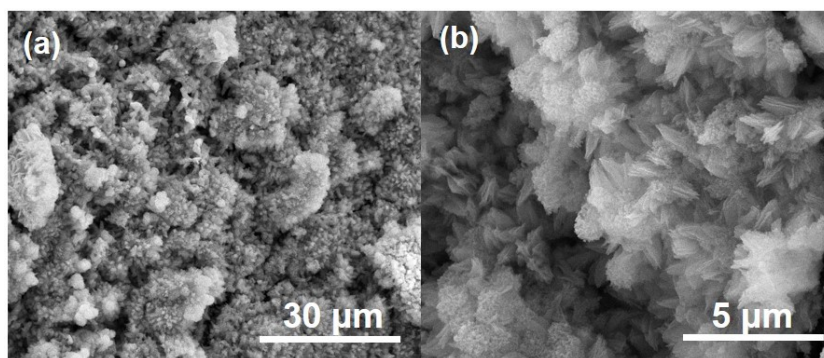

**Figure S14** SEM images of FeCoNi-NS-ACVs after stability test of OER with different magnifications.

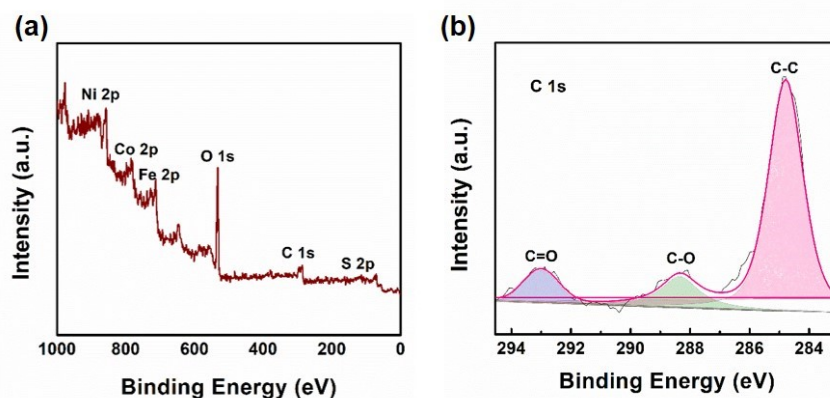

**Figure S15** XPS survey spectrum (a) and high-resolution of C 1s (b) of the designed FeCoNi-NS-ACVs after long-time stability test.

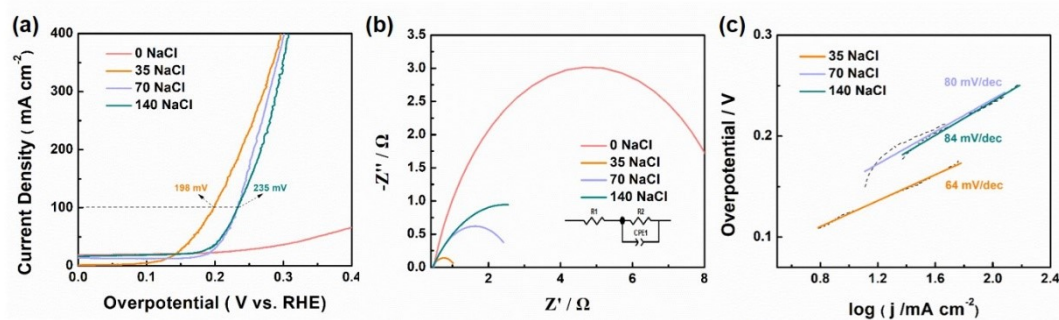

**Figure S16** Electrochemical measurements: (a) OER polarization curves, (b) Nyquist plots, (c) Tafel slopes of obtained catalysts in 1M KOH.

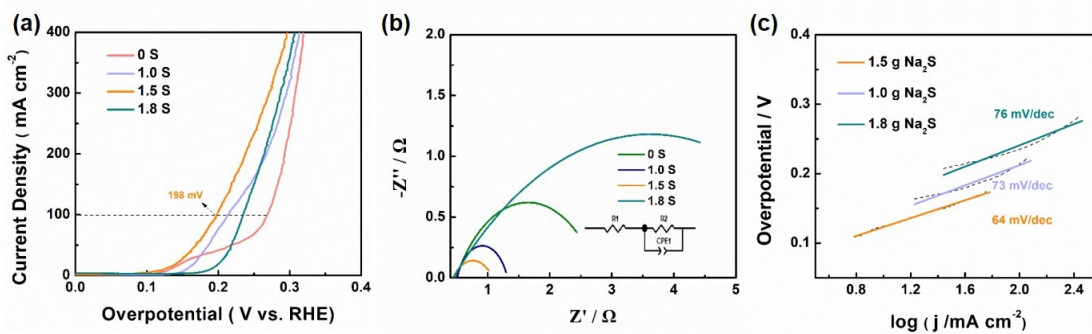

**Figure S17** Electrochemical measurements: (a) OER polarization curves, (b) Nyquist plots, (c) Tafel slopes of obtained catalysts in 1M KOH.

**Table S1** Element content of Fe, Co and Ni in 1M KOH containing Na<sub>2</sub>S determined using ICP.

| State of Na <sub>2</sub> S solution | Element | the element content of the solution ( mg/L) | Diluted multiples | Sample element content ( mg/L) |
|-------------------------------------|---------|---------------------------------------------|-------------------|--------------------------------|
| initial                             | Fe      | < 0.02                                      | 10                | < 0.02                         |
| final                               | Fe      | 0.37                                        | 10                | 3.7                            |
| initial                             | Ni      | < 0.02                                      | 10                | < 0.02                         |
| final                               | Ni      | 0.15                                        | 10                | 1.46                           |
| initial                             | Co      | < 0.02                                      | 10                | < 0.02                         |
| final                               | Co      | < 0.02                                      | 10                | < 0.02                         |
| initial                             | S       | 8.35                                        | 1000              | 8354.02                        |
| final                               | S       | 8.28                                        | 1000              | 8279.81                        |

**Table S2 Comparison of the OER activity and Tafel slope between FeCoNi-NS-ACVs and other electrocatalysts.**

| Catalysts                                 | Electrolyte | Overpotential (mV) | Tafel slope (mV dec <sup>-1</sup> ) | Reference                                      |
|-------------------------------------------|-------------|--------------------|-------------------------------------|------------------------------------------------|
| FeCoNi-NS-ACVs                            | 1 M KOH     | 125                | 64.0                                | This work                                      |
| NiCo <sub>2</sub> S <sub>4</sub> /Fe-2    | 1 M KOH     | 200                | 71.0                                | <i>Nano Energy</i> 2020, 78, 105230            |
| Ru-RuPx-CoxP                              | 1 M KOH     | 291                | 85.4                                | <i>Nano Energy</i> 2018, 53, 270-276           |
| NiCo-P/NF                                 | 1 M KOH     | 280                | 73.0                                | <i>Nano Lett.</i> 2016, 16, 7718–7725          |
| Fe, Mn-Ni <sub>3</sub> S <sub>2</sub> /NF | 1 M KOH     | 216                | 63.3                                | <i>J. Mater. Chem. A</i> 2017, 5, 14828–14837. |



|                             |         |     |      |                                                     |
|-----------------------------|---------|-----|------|-----------------------------------------------------|
| CoO/Co                      | 1 M KOH | 350 | 97.6 | <i>ACS Energy Lett.</i><br>2017, 2, 1208–1213       |
| NiSe/NF                     | 1 M KOH | 270 | 64.0 | <i>Angew. Chem. Int. Ed.</i> 2015, 54, 9351–9355.   |
| S:Co <sub>2</sub> P@Ni foam | 1 M KOH | 280 | 71.0 | <i>Chem. Mater.</i> 2018, 30, 8861–8870.            |
| NiCoP NR@NS                 | 1 M KOH | 268 | 75.0 | <i>ACS Appl. Mat. Inter.</i> 2018, 10, 41237–41245. |
| Fe-Mn-O NSs/CC              | 1 M KOH | 273 | 63.9 | <i>Adv. Funct. Mater.</i> 2018, 28, 1802463.        |

**Table S3 Comparison of electrocatalytic performances for OER.**

| Catalysts                                                                            | Electrolyte | Overpotential (mV) at 10 mA cm <sup>-2</sup> | Reference                                      |
|--------------------------------------------------------------------------------------|-------------|----------------------------------------------|------------------------------------------------|
| FeCoNi-NS-ACVs                                                                       | 1 M KOH     | 125                                          | This work                                      |
| 3D-V-Ni <sub>3</sub> S <sub>2</sub> -NiFe                                            | 1 M KOH     | 209                                          | <i>J Mater Chem A</i> 2019, 7, 18118-18125     |
| Ni <sub>3</sub> S <sub>2</sub> nanorod@NiFe LDH nanofilms                            | 1 M KOH     | 245                                          | <i>J Mater Chem A</i> 2018, 6, 10253-10263     |
| FeP/Ni <sub>2</sub> P                                                                | 1 M KOH     | 154                                          | <i>Nat. Commun.</i> 2018, 9, 2551              |
| MoS <sub>2</sub> /Co <sub>9</sub> S <sub>8</sub> /Ni <sub>3</sub> S <sub>2</sub> /Ni | 1 M KOH     | 166                                          | <i>J. Am. Chem. Soc.</i> 2019, 141, 10417      |
| MoS <sub>2</sub> /Ni <sub>3</sub> S <sub>2</sub> /Ni                                 | 1 M KOH     | 218                                          | <i>Angew. Chem. Int. Ed.</i> , 2016, 128, 6814 |
| NiFe LDH-NS@DG                                                                       | 1 M KOH     | 210                                          | <i>Adv. Mater.</i> 2017, 29, 1700017           |
| (Fe <sub>x</sub> Ni <sub>1-x</sub> ) <sub>2</sub> P                                  | 1 M KOH     | 156                                          | <i>Nano Energy</i> 2017, 38, 553               |
| NiMoO <sub>x</sub> /NiMoS                                                            | 1 M KOH     | 186                                          | <i>Nat. Commun.</i> 2020, 11, 5462             |
| FeCoNi-HNTAs                                                                         | 1 M KOH     | 184                                          | <i>Nat. Commun.</i> 2018, 9, 2452              |
| V-CoP@a-CeO <sub>2</sub>                                                             | 1 M KOH     | 225                                          | <i>Adv. Funct. Mater.</i> 2020, 30, 1909618    |

|                                          |         |     |                                                       |
|------------------------------------------|---------|-----|-------------------------------------------------------|
| Ni <sub>3</sub> N/CMFs/Ni <sub>3</sub> N | 1 M KOH | 273 | <i>J. Mater. Chem. A</i> , 2017, 5, 9377              |
| NiCoP                                    | 1 M KOH | 242 | <i>ACS Catal.</i> 2017, 7, 4131                       |
| Co <sub>9</sub> S <sub>8</sub>           | 1 M KOH | 302 | <i>Adv. Funct. Mater.</i> , 2017, 1606585             |
| Ni-Fe NP                                 | 1 M KOH | 200 | <i>Nat. Commun.</i> 2019, 10                          |
| FeCo-NiSe <sub>2</sub>                   | 1 M KOH | 251 | <i>Adv. Mater.</i> 2018, 30, 1802121                  |
| FeNi <sub>3</sub> N/Ni                   | 1 M KOH | 202 | <i>Chem. Mater.</i> , 2016, 28, 6934                  |
| Ti <sub>3</sub> C <sub>2</sub> @mNiCoP   | 1 M KOH | 237 | <i>ACS Appl. Mater. Interf.</i> 2020, 12, 18570-18577 |
| N <sub>2</sub> -CoS <sub>2</sub> -400    | 1 M KOH | 240 | <i>ACS Catal.</i> 2017, 7, 4214                       |

**Table S4** Comparison of the Rct ( $\Omega$ ) values of Fe-S, FeCoNi-S, FeNi-NS-ACVs, FeCo-NS-ACVs and FeCoNi- NS-ACVs in 1M KOH.

| Catalysts       | Rct / $\Omega$ |
|-----------------|----------------|
|                 | 1.0 M KOH      |
| Fe-S            | 60.17          |
| FeCoNi-S        | 1.29           |
| FeNi- NS-ACVs   | 0.56           |
| FeCo- NS-ACVs   | 15.7           |
| FeCoNi- NS-ACVs | 0.39           |

**Table S5** Comparison of the electrocatalytic performances overall water splitting

| Catalysts | Electrolyte | Cell Voltage (V) at 10 mA | Reference |
|-----------|-------------|---------------------------|-----------|
|-----------|-------------|---------------------------|-----------|

|                                                           |         | <b>cm<sup>-2</sup></b> |                                                      |
|-----------------------------------------------------------|---------|------------------------|------------------------------------------------------|
| <b>FeCoNi-NS-ACVs</b>                                     | 1 M KOH | 1.37                   | This work                                            |
| <b>(Ni<sub>x</sub>Fe<sub>1-x</sub>)<sub>2</sub>P@PC/P</b> | 1 M KOH | 1.45                   | <i>Adv. Funct. Mater.</i> 2021, 2010912              |
| <b>Ni/γ-Fe<sub>2</sub>O<sub>3</sub></b>                   | 1 M KOH | 1.47                   | <i>Nat. Commun.</i> 2019, 10, 5599                   |
| <b>IrNi-FeNi<sub>3</sub>/NF</b>                           | 1 M KOH | 1.47                   | <i>Appl. Catal. B</i> 2021, 286, 119881              |
| <b>RuCu NSs/C</b>                                         | 1 M KOH | 1.49                   | <i>Angew. Chem. Int. Ed.</i> 2019, 58, 13983 – 13988 |
| <b>NiVIr LDH</b>                                          | 1 M KOH | 1.49                   | <i>ACS Energy Lett.</i> 2019, 4, 1823–1829           |
| <b>Fe<sub>2</sub>Co-MOF/NF</b>                            | 1 M KOH | 1.49                   | <i>J. Mater. Chem. A</i> , 2021,9, 11415-11426       |
| <b>FeNiS/Ni</b>                                           | 1 M KOH | 1.51                   | <i>Adv. Energy Mater.</i> 2020, 2001963              |
| <b>Ir@S-C/rGO</b>                                         | 1 M KOH | 1.51                   | <i>J. Mater. Chem. A</i> , 2021, 9, 4176–4183        |
| <b>Fe-CoP/Ni(OH)<sub>2</sub></b>                          | 1 M KOH | 1.52                   | <i>Adv. Funct. Mater.</i> 2021, 2101578              |
| <b>CoNC@Co<sub>2</sub>N/CPs</b>                           | 1 M KOH | 1.52                   | <i>Adv. Energy Mater.</i> 2020, 10, 2002214          |
| <b>NiFe-LDH@NiCu</b>                                      | 1 M KOH | 1.53                   | <i>Adv. Mater.</i> 2019, 31, 1806769                 |
| <b>FeCoNi/CC</b>                                          | 1 M KOH | 1.55                   | <i>Adv. Energy Mater.</i> 2019, 9, 1901312           |
| <b>NiCo-P/NF</b>                                          | 1 M KOH | 1.58                   | <i>Nano Lett.</i> 2016, 16, 7718–7725                |
| <b>CoP-InNC</b>                                           | 1 M KOH | 1.58                   | <i>Adv. Sci.</i> 2020, 7, 1903195                    |
| <b>Ni<sub>0.75</sub>Fe<sub>0.25</sub>-N, P, S/C</b>       | 1 M KOH | 1.60                   | <i>J. Power Sources</i> 2018, 401, 312–321           |
| <b>Cu<sub>3</sub>N</b>                                    | 1 M KOH | 1.60                   | <i>ACS Energy Lett.</i> 2019, 4, 747                 |
| <b>O-CoP</b>                                              | 1 M KOH | 1.60                   | <i>Adv. Funct. Mater.</i> 2020, 30, 1905252          |
| <b>NiCo<sub>2</sub>O<sub>4</sub></b>                      | 1M NaOH | 1.65                   | <i>Angew. Chem. Int. Ed.</i> 2016, 55, 6290 –6294    |

|                |         |      |                                |
|----------------|---------|------|--------------------------------|
| <b>NiCoFeB</b> | 1 M KOH | 1.75 | <i>Small</i> 2019, 15, 1804212 |
|----------------|---------|------|--------------------------------|
